# Supplementary material
Source: ML conference proceedings conference paper supplement (https://www.ecva.net/papers/eccv_2020/papers_ECCV/html/123520596_ECCV_2020_paper.php)
Supplement: Supplementary file 3 [file 123520596-supp.zip]

Archive with 7 entries (6 files):
- 0344-supp/
- 0344-supp/.DS_Store
- __MACOSX/0344-supp/._.DS_Store
- 0344-supp/0344-supp.mp4
- __MACOSX/0344-supp/._0344-supp.mp4
- 0344-supp/0344-supp.pdf
- __MACOSX/0344-supp/._0344-supp.pdf
